# Supplementary material for: Understanding the process of healing of thermoreversible covalent adaptable networks
Source: Royal Society of Chemistry journal article supplement (doi:10.1039/c2py20960h), 2012-12-05
Supplement: c2py20960h.pdf [file c2py20960h.pdf]

## Supplemental

Equation 6.3 was solved numerically using an adaptive-step Runge-Kutte 4th order integration algorithm (MATLAB's ode45 built-in). The differential equation was defined as:

$$\frac{dF}{dt} + \frac{F}{t_m} = 0 \quad (S1)$$

$$H = 1 - F \quad (S2)$$

where F is a population of “flaws” that can be healed by mechanical relaxation. The lack of any other flaws or healing modes is a basis assumption of the model. Equation 3 results when S1 is integrated by parts with the initial condition of  $t=0$ ,  $F=1$ . The resulting expression for F is then substituted into S2. The functional form of  $\tau_m(t)$  was determined by multiplying the time dependent functions  $\tau_b(t)$  and  $\epsilon(t)=p(t)-p_{gel}$  by the scaling proportionality C. Bond conversion  $p(t)$  was determined by solving the kinetic model of the Diels-Alder reaction as in previous work<sup>7j</sup> but incorporating the temperature dependence (and therefore time dependence) of the kinetic parameters via the interpolation of Figure 3.  $\tau_b(t)=1/k_r(t)$  was calculated in this fashion as well. Initial conditions of the kinetic model were determined by assuming a post-heating temperature decay to ambient with a time constant of 1.5 minutes (the qualitative time to vitrification for a typical induction heating experiment,) solving the kinetic model for an additional 5 minutes post-heating, and assuming the final conversion remained constant due to kinetic limitations caused by physical vitrification. This resulted in initial conversions that were ~1% greater than those predicted to occur at equilibrium at healing conditions.
